# Supplementary material for: The secondary structural difference between Lewy body and glial cytoplasmic inclusion in autopsy brain with synchrotron FTIR micro-spectroscopy
Source: PubMed Central journal article supplement (PMC7656264; doi:10.1038/s41598-020-76565-6), 2020-11-10
Supplement: 41598_2020_76565_MOESM1_ESM.pdf [file 41598_2020_76565_MOESM1_ESM.pdf]

## Supplementary Information for

### **The secondary structural difference between Lewy body and glial cytoplasmic inclusion in autopsy brain with synchrotron FTIR micro-spectroscopy**

Katsuya Araki <sup>1, 2 \*</sup>, Naoto Yagi <sup>3</sup>, Yuka Ikemoto <sup>3</sup>, Hideki Hayakawa <sup>1</sup>, Harutoshi Fujimura <sup>4</sup>, Taro Moriwaki <sup>3</sup>, Yoshitaka Nagai <sup>5</sup>, Shigeo Murayama <sup>6</sup> and Hideki Mochizuki <sup>1</sup>

<sup>1</sup> Department of Neurology, Osaka University Graduate School of Medicine, 2-2 Yamadaoka, Suita, Osaka 565-0871, Japan

<sup>2</sup> Toyonaka Municipal Hospital, 4-14-1 Shibaharacho, Toyonaka, Osaka 560-8565, Japan

<sup>3</sup> Japan Synchrotron Radiation Research Institute (JASRI/SPring-8), 1-1-1 Kouto, Sayo, Sayo, Hyogo 679-5198, Japan

<sup>4</sup> Department of Neurology, Toneyama National Hospital, 5-1-1 Toneyama, Toyonaka, Osaka 560-8522, Japan

<sup>5</sup> Department of Neurotherapeutics, Osaka University Graduate School of Medicine, 2-2 Yamadaoka, Suita, Osaka 565-0871, Japan

<sup>6</sup> Department of Neuropathology, The Brain Bank for Aging Research, Tokyo Metropolitan Geriatric Hospital and Institute of Gerontology, 35-2 Sakaecho, Itabashi-ku, Tokyo 173-0015, Japan

### Supplementary Table S1

| <b>Case</b> | <b>Sex</b> | <b>Age</b> | <b>Cause of death</b>           | <b>Clinical diagnosis</b> | <b>Neuropathological diagnosis</b> |
|-------------|------------|------------|---------------------------------|---------------------------|------------------------------------|
| <b>MSA1</b> | M          | 76         | pneumonia                       | MSA                       | MSA                                |
| <b>MSA2</b> | F          | 71         | aspiration pneumonia            | PD?                       | MSA                                |
| <b>MSA3</b> | F          | 85         | pneumonia                       | MSA                       | MSA                                |
| <b>MSA4</b> | F          | 62         | unknown                         | unknown                   | MSA                                |
| <b>PD1</b>  | M          | 85         | aspiration pneumonia            | PD                        | PD                                 |
| <b>PD2</b>  | F          | 83         | shock                           | PD                        | PD                                 |
| <b>PD3</b>  | F          | 90         | urinary tract infection, sepsis | PD                        | PD                                 |
| <b>PD4</b>  | M          | 83         | pneumonia                       | PD                        | PD                                 |

Summary of brain tissue samples.

## Supplementary Figure S1

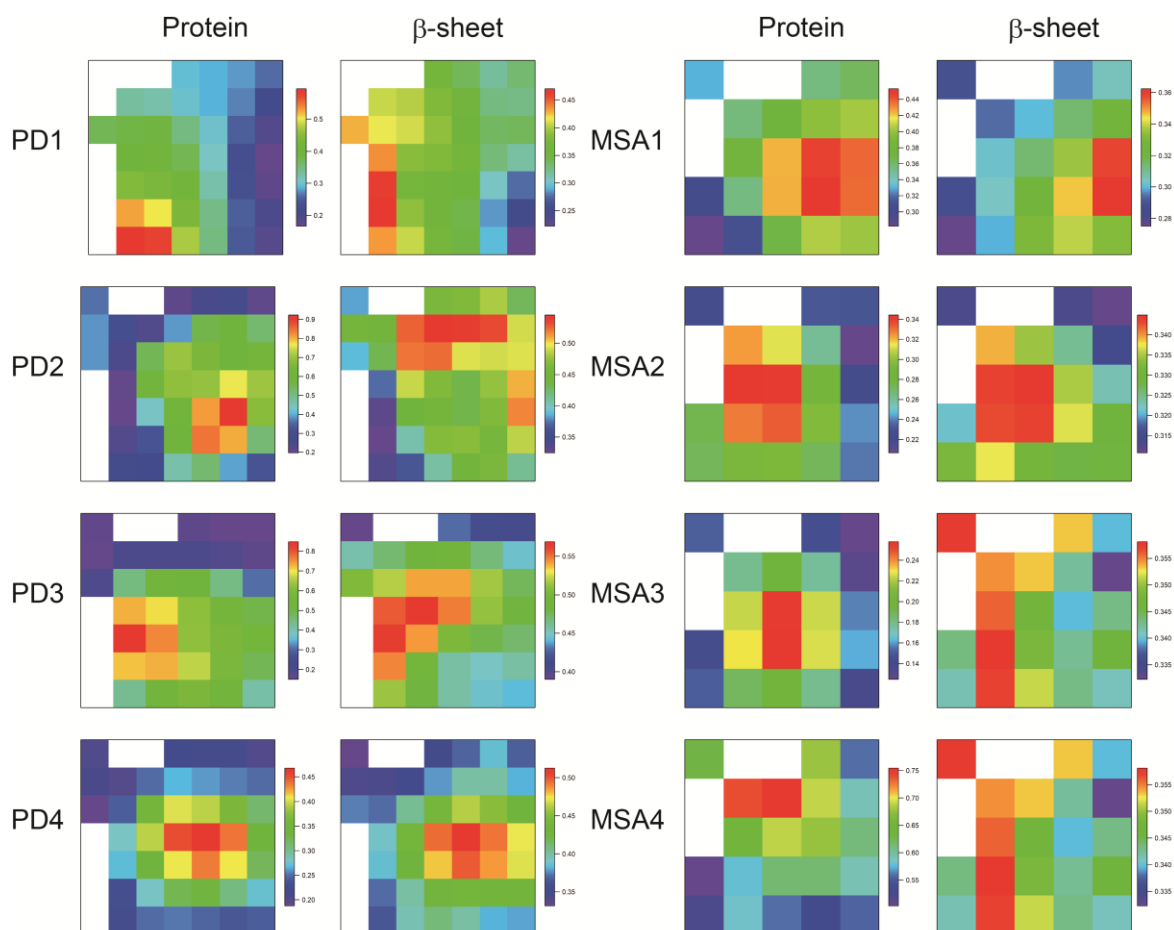

FTIR images of LBs and GCIs in PD and MSA patients. The amount of total proteins, and the proportion of  $\beta$ -sheet structure are mapped. These images are the same as those in Figures 1 and 2 except that they are not smoothed.

## Supplementary Figure S2

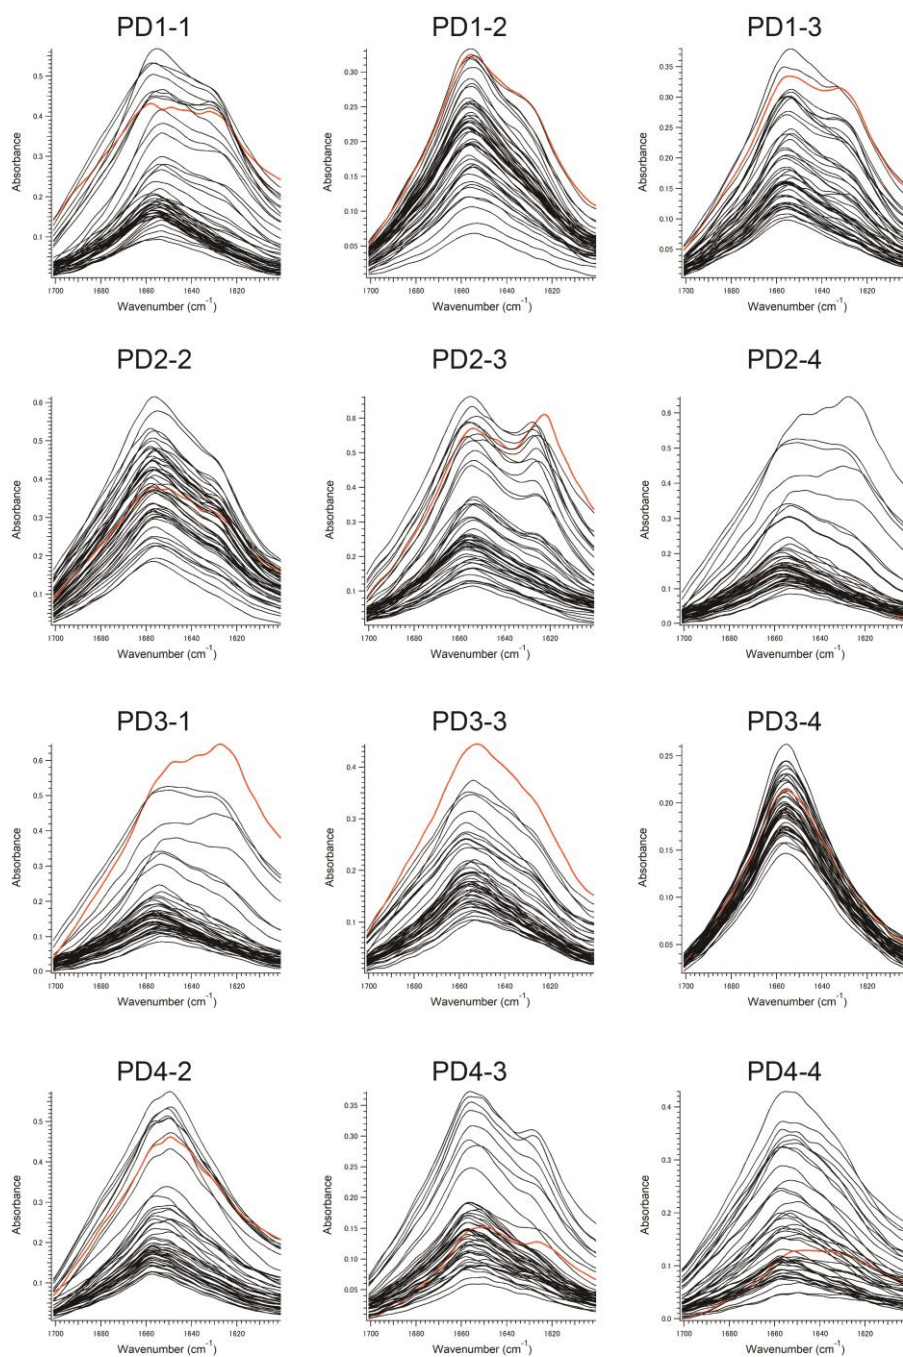

All the FTIR spectra of PD patients. Four LBs were scanned for each patient and a spectrum of one LB is shown in Figure 1. The red solid line in the spectra shows the FTIR spectra of the  $\beta$ -sheet richest point in each LB.

## Supplementary Figure S3

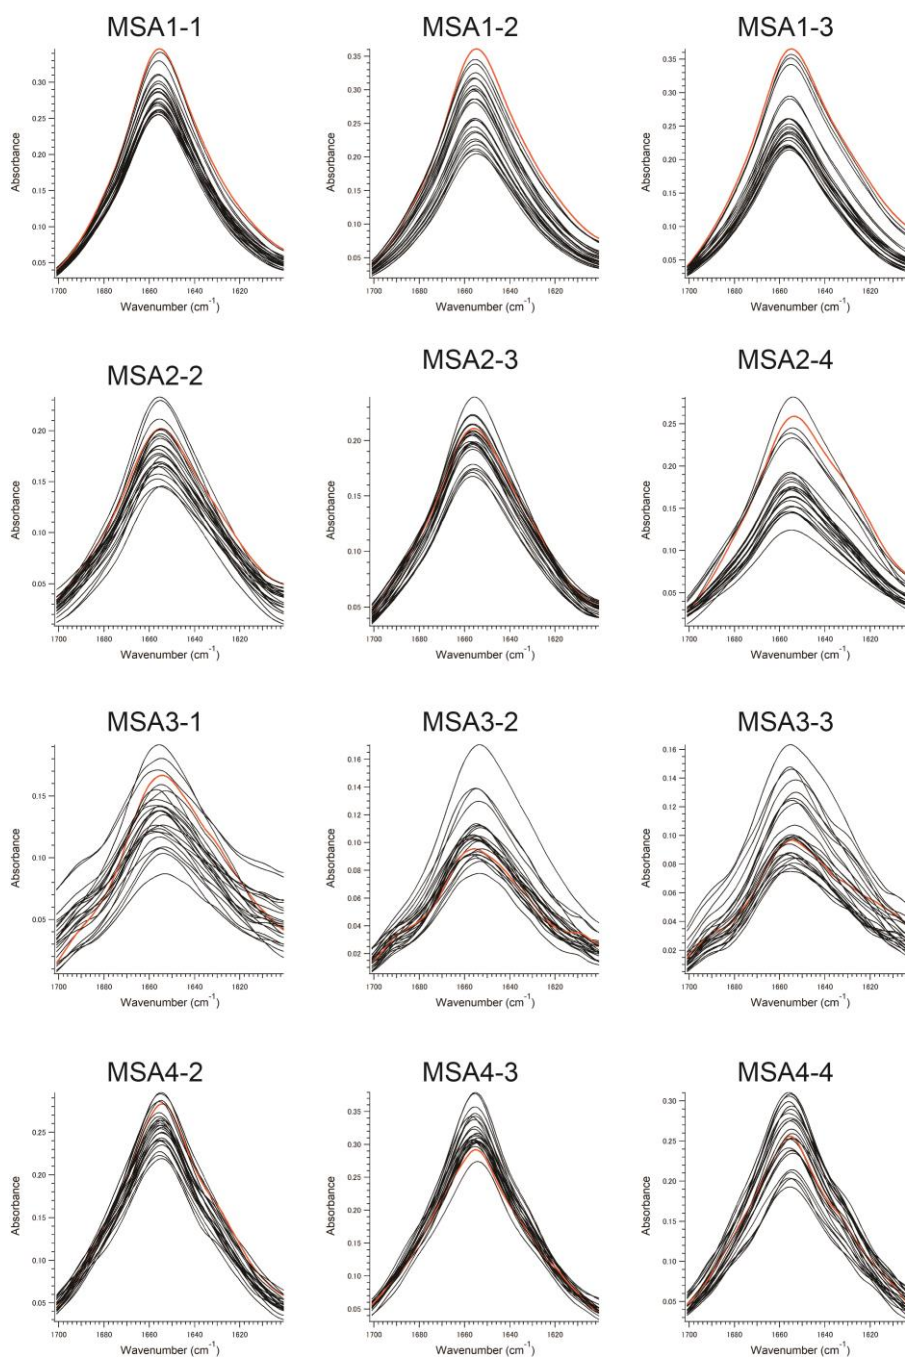

All the FTIR spectra of MSA patients. Four GCIs were scanned for each patient and a spectrum for one GCI is shown in Figure 2. The red solid line in the spectra shows the FTIR spectra of the  $\beta$ -sheet richest point in each GCI.
